# Supplementary material for: Tetrahedral node diamondyne frameworks for CO2 adsorption and separation
Source: Royal Society of Chemistry journal article supplement (doi:10.1039/c3ta15062c), 2014-01-01
Supplement: c3ta15062c.pdf [file c3ta15062c.pdf]

# Supporting Information

## Tetrahedral node diamondyne frameworks for CO<sub>2</sub> adsorption and separation

Ling Huang, Xiaofei Zeng and Dapeng Cao\*

Division of Molecular and Materials Simulation, State Key Lab of Organic-Inorganic Composites, Beijing University of Chemical Technology, Beijing 100029, China.

Email: [caodp@mail.buct.edu.cn](mailto:caodp@mail.buct.edu.cn)

### 1. Computational Details

The geometrical optimizations were performed *via* Vienna *ab-initio* simulation package (VASP),<sup>1</sup> where the projected augmented wave generalized gradient approximation (PAW-LDA) method was adopted. All the structures were optimized aiming at the global energy minimum, and fully relaxed until the residual force convergence value on each atom is less than 0.01eV/Å. The Brillouin zone was sampled with a set of K-point grid (5×5×5) according to the Monkhorst-Pack scheme, which is large enough in our calculations. As a result, both TND-1 and TND-2 belong to the cubic space group P1 with unit cell parameters (a=b=c) of 21.9871 and 15.6602 Å, respectively. In addition, the pore size of tetrahedron is ~4 Å, while for the outer maintained diamond-like cavity, they are 17 Å and 11 Å in TND-1 and TND-2, respectively. In addition, the angle of C-C≡C is about 158°, which is comparable with what has been reported by Diederich (161°),<sup>2</sup> and the density of TND-1 and TND-2 are respectively 0.30 and 0.66 g/cm<sup>3</sup>. Moreover, the calculated BET surface area for TND-1 and TND-2 are 6250 and 2990 m<sup>2</sup>/g, respectively. The formation energy of TND-1 and TND-2 are 1.164 and 1.091 eV/atom, indicating the thermodynamics stability for both two configurations.

Furthermore, both adsorption and separation behaviors at ambient condition were explored by Grand Canonical Monte Carlo (GCMC) simulation in MUSIC program package.<sup>3</sup> During the GCMC simulation, periodic boundary conditions were imposed in

all three directions and the LJ potentials were cut off at the position of the half of the minimal box size. For each pressure point,  $3 \times 10^7$  configurations were generated, where the first  $1.5 \times 10^7$  configurations were discarded to guarantee equilibration and the second  $1.5 \times 10^7$  configurations were divided into 10 blocks to calculate the ensemble average. The uncertainties of the final results, including the ensemble averages of the number of adsorbate molecules in the simulation cell and the total potential energy, were estimated to be within  $\pm 2\%$ .

**Table S1.** LJ parameters ( $\epsilon/k_B$  [K],  $\sigma$  [Å]) for CO<sub>2</sub>, CH<sub>4</sub>, N<sub>2</sub>, H<sub>2</sub> and adsorbents (TND-1 and TND-2), respectively.

|                    | C-CO <sub>2</sub> | O-CO <sub>2</sub> | CH <sub>4</sub> | N <sub>2</sub> | H <sub>2</sub> | C-TND-1 | C-TND-2 |
|--------------------|-------------------|-------------------|-----------------|----------------|----------------|---------|---------|
| $\epsilon/k_B$ [K] | 27.0              | 79.0              | 148.0           | 94.95          | 36.7           | 47.9    |         |
| $\sigma$ [Å]       | 2.80              | 3.05              | 3.73            | 3.549          | 2.958          | 3.47    |         |
| q [e]              | 0.70              | -0.35             | 0               | 0              | 0              | 0       |         |

Table S1 gives the LJ parameters for adsorbates and adsorbent used in GCMC simulations. LJ parameters for framework atom (all carbon) was assigned based on the DREIDING force field<sup>4</sup> and CO<sub>2</sub> was modeled using the TraPPE force field of Potoff and Siepmann,<sup>5</sup> where a 3-site CO<sub>2</sub> model with LJ parameters and partial charges imposed to best reproduce experimental CO<sub>2</sub> vapor-liquid equilibrium data. Here in the simulation of CO<sub>2</sub> adsorption, we only considered the electrostatic interaction of inter- & intra- CO<sub>2</sub> molecules, and ignored the atomic charges of the TND-1 and TND-2, for the fact that there is no metal atom in them. CH<sub>4</sub><sup>6</sup> and H<sub>2</sub><sup>7</sup> were represented by spherical united-atom model, while for the 1-site model of N<sub>2</sub>,<sup>8</sup> we adopted the LJ parameters from Kaneko and Seaton et al. The set of parameters has already been successfully used in our recent work by Yang et al., and the accuracy for calculations was guaranteed.<sup>9</sup> In addition, the Lorentz-Berthelot combining rules were used to calculate the cross-interaction parameters, and interactions were cut off at a distance of 14.0 Å.

In this work, to obtain the pore volume  $V_{pore}$ , we used the method of Myers *et al.* from the idea gas law (Eq. S1)<sup>10</sup>

$$V_{pore} = \frac{RN_m T}{Pm_m}$$

where  $R$  is the gas constant,  $T$  is the temperature,  $P$  is the pressure, and  $N_m$  is the number of adsorbed probe molecules per molar mass  $m_m$  of the adsorbents.

In addition, we calculated the isosteric heat,  $Q_{st}$ , which reflects the released heat for each molecule added to the adsorbed phase, by the following equation (Eq. S2)<sup>11</sup>

$$Q_{st} = \frac{\langle U \rangle \langle N \rangle - \langle UN \rangle}{\langle N^2 \rangle - \langle N \rangle \langle N \rangle} + k_B T$$

where  $\langle \dots \rangle$  denotes the ensemble average,  $N$  is the number of particles, and  $U$  is the configuration energy of system.

The adsorption selectivity  $S$  is a good indicator to evaluate the separation property of nanoporous materials for equilibrium separation process. Here, the adsorption selectivity (Eq. S3) of component  $i$  over  $j$  in a binary mixture is defined as

$$S = \left( \frac{x_i}{x_j} \right)_{pore} / \left( \frac{y_i}{y_j} \right)_{bulk}$$

where  $x$  and  $y$  represent the molar fractions of components in the adsorbed and bulk phases, respectively.

## 2. Snapshots

To intuitively illustrate the selectivity trend of CO<sub>2</sub>/H<sub>2</sub> in TND-2 frameworks, Figure S1 shows snapshots of binary mixture (CO<sub>2</sub>/H<sub>2</sub>) adsorbed in TND-2. CO<sub>2</sub> and H<sub>2</sub> were marked in red and green, respectively. It can be seen that, at low pressures, the adsorbed adsorbates mainly accumulated on the surface of substrates. Moreover, there is no molecule entering the tetrahedron, due to the insufficient pore size (~4 Å) with respect to the molecular dynamical diameter of CO<sub>2</sub> (3.3 Å), CH<sub>4</sub> (3.76 Å), N<sub>2</sub> (3.64 Å), and H<sub>2</sub> (2.89 Å).<sup>12</sup> In addition, at low pressure, the uptake of both CO<sub>2</sub> and H<sub>2</sub> are increasing with pressure rising (see Figure S1a, b and c); while pressure is high, the situation is changing, namely the speed for the increase of H<sub>2</sub> exceeds that of CO<sub>2</sub> (see Figure S1d, e and f) because the adsorption of CO<sub>2</sub> tends to saturation amount and remains unchanged while H<sub>2</sub> with the smaller molecular diameter can still enter the pore, hence resulting in the phenomenon that the selectivity of CO<sub>2</sub>/H<sub>2</sub> shall be increasing at low pressure and

decreasing when pressure continues to rise. The snapshots provide a good microscopic explanation for the adsorptive separation of CO<sub>2</sub> over H<sub>2</sub> in TND-2 shown in Figure 3 (corresponding to the state point of A, B, C, D, E, and F).

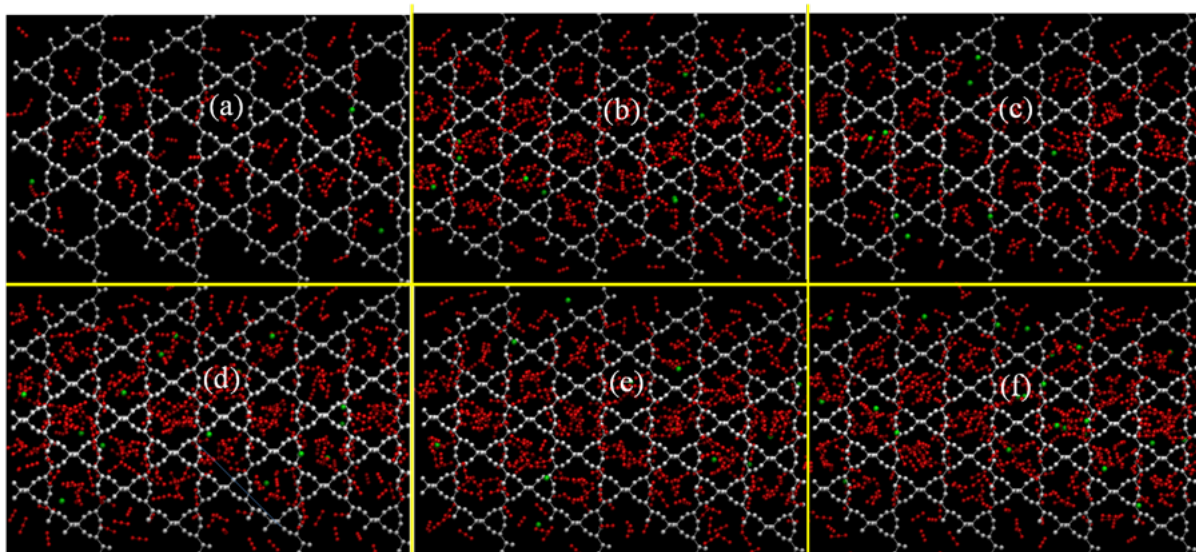

**Figure S1.** The snapshots for selectivity of CO<sub>2</sub>/H<sub>2</sub> in TND-2, the simulation box for TND-2 in GCMC calculations is the 4×2×2 unit cell. (a)~(f) denotes the configuration at pressure of 5, 15, 30, 50, 80, and 100 bar, respectively.

## References

- (1) G. Kresse; J. Furthmüller *Phys. Rev. B* **1996**, *54*, 11169.
- (2) F. Diederich *Nature* **1994**, *369*, 199.
- (3) A. Gupta; S. Chempath; M. J. Sanborn; L. A. Clark; R. Q. Snurr *Mol. Simul.* **2003**, *29*, 29.
- (4) S. L. Mayo; B. D. Olafson; W. A. Goddard *J Phys. Chem.* **1990**, *94*, 8897.
- (5) J. J. Potoff; J. I. Siepmann *Aiche J* **2001**, *47*, 1676.
- (6) E. D. Bloch; W. L. Queen; R. Krishna; J. M. Zadrozny; C. M. Brown; J. R. Long *Science* **2012**, *335*, 1606.
- (7) D. Levesque; A. Gicquel; F. L. Darkrim; S. B. Kayiran *J Phys.-Condens. Mat.* **2002**, *14*, 9285.
- (8) T. Ohkubo; J. Miyawaki; K. Kaneko; R. Ryoo; N. A. Seaton *J Phys.Chem. B* **2002**, *106*, 6523.
- (9) Z. L. Yang; X. Peng; D. P. Cao *J Phys. Chem. C* **2013**, *117*, 8353.
- (10) (a)A. L. Myers; P. A. Monson *Langmuir* **2002**, *18*, 10261; (b)O. Talu; A. L. Myers *Aiche J* **2001**, *47*, 1160.
- (11) J. H. Lan; D. P. Cao; W. C. Wang *Langmuir* **2010**, *26*, 220.
- (12) H. Y. Zhao; Z. Jin; H. M. Su; J. L. Zhang; X. D. Yao; H. J. Zhao; G. S. Zhu *Chem. Commun.* **2013**, *49*, 2780.

## TND-1 CIF Data

```
data_T-opt
_audit_creation_date      2013-07-17
_audit_creation_method    'Materials Studio'
_symmetry_space_group_name_H-M  'P1'
_symmetry_Int_Tables_number  1
_symmetry_cell_setting    triclinic
loop_
_symmetry_equiv_pos_as_xyz
  x,y,z
_cell_length_a            21.9871
_cell_length_b            21.9871
_cell_length_c            21.9871
_cell_angle_alpha         90.0000
_cell_angle_beta          90.0000
_cell_angle_gamma         90.0000
loop_
_atom_site_label
_atom_site_type_symbol
_atom_site_fract_x
_atom_site_fract_y
_atom_site_fract_z
_atom_site_U_iso_or_equiv
_atom_site_adp_type
_atom_site_occupancy
C1      C      0.18117  0.18118  0.18117  0.00000  Uiso  1.00
C2      C      0.18118  0.31882  0.31882  0.00000  Uiso  1.00
C3      C      0.31893  0.31893  0.18137  0.00000  Uiso  1.00
C4      C      0.31882  0.18118  0.31882  0.00000  Uiso  1.00
C5      C      0.18117  0.68117  0.68117  0.00000  Uiso  1.00
C6      C      0.68117  0.68117  0.18117  0.00000  Uiso  1.00
C7      C      0.68117  0.18117  0.68117  0.00000  Uiso  1.00
C8      C      0.81883  0.18117  0.81883  0.00000  Uiso  1.00
C9      C      0.18117  0.81883  0.81883  0.00000  Uiso  1.00
C10     C      0.81883  0.81883  0.18117  0.00000  Uiso  1.00
C11     C      0.93118  0.56882  0.43118  0.00000  Uiso  1.00
C12     C      0.81882  0.68118  0.31882  0.00000  Uiso  1.00
C13     C      0.81882  0.31882  0.68118  0.00000  Uiso  1.00
C14     C      0.93118  0.43118  0.56882  0.00000  Uiso  1.00
C15     C      0.31882  0.68118  0.81882  0.00000  Uiso  1.00
C16     C      0.43118  0.56882  0.93118  0.00000  Uiso  1.00
C17     C      0.56882  0.43118  0.93118  0.00000  Uiso  1.00
```

|     |   |         |         |         |         |      |      |
|-----|---|---------|---------|---------|---------|------|------|
| C18 | C | 0.68118 | 0.31882 | 0.81882 | 0.00000 | Uiso | 1.00 |
| C19 | C | 0.68118 | 0.81882 | 0.31882 | 0.00000 | Uiso | 1.00 |
| C20 | C | 0.56882 | 0.93118 | 0.43118 | 0.00000 | Uiso | 1.00 |
| C21 | C | 0.31882 | 0.81882 | 0.68118 | 0.00000 | Uiso | 1.00 |
| C22 | C | 0.43118 | 0.93118 | 0.56882 | 0.00000 | Uiso | 1.00 |
| C23 | C | 0.39126 | 0.89125 | 0.60877 | 0.00000 | Uiso | 1.00 |
| C24 | C | 0.35875 | 0.85874 | 0.64124 | 0.00000 | Uiso | 1.00 |
| C25 | C | 0.14123 | 0.64126 | 0.64125 | 0.00000 | Uiso | 1.00 |
| C26 | C | 0.10875 | 0.60876 | 0.60874 | 0.00000 | Uiso | 1.00 |
| C27 | C | 0.14123 | 0.85874 | 0.85875 | 0.00000 | Uiso | 1.00 |
| C28 | C | 0.10874 | 0.89125 | 0.89125 | 0.00000 | Uiso | 1.00 |
| C29 | C | 0.35874 | 0.64124 | 0.85874 | 0.00000 | Uiso | 1.00 |
| C30 | C | 0.39124 | 0.60875 | 0.89125 | 0.00000 | Uiso | 1.00 |
| C31 | C | 0.64123 | 0.85873 | 0.35874 | 0.00000 | Uiso | 1.00 |
| C32 | C | 0.60873 | 0.89123 | 0.39124 | 0.00000 | Uiso | 1.00 |
| C33 | C | 0.14124 | 0.35872 | 0.35876 | 0.00000 | Uiso | 1.00 |
| C34 | C | 0.10873 | 0.39123 | 0.39125 | 0.00000 | Uiso | 1.00 |
| C35 | C | 0.64125 | 0.35874 | 0.85876 | 0.00000 | Uiso | 1.00 |
| C36 | C | 0.60874 | 0.39124 | 0.89124 | 0.00000 | Uiso | 1.00 |
| C37 | C | 0.89124 | 0.89126 | 0.10874 | 0.00000 | Uiso | 1.00 |
| C38 | C | 0.85875 | 0.85874 | 0.14123 | 0.00000 | Uiso | 1.00 |
| C39 | C | 0.10876 | 0.10876 | 0.10873 | 0.00000 | Uiso | 1.00 |
| C40 | C | 0.14125 | 0.14126 | 0.14124 | 0.00000 | Uiso | 1.00 |
| C41 | C | 0.89124 | 0.10873 | 0.89124 | 0.00000 | Uiso | 1.00 |
| C42 | C | 0.85874 | 0.14122 | 0.85874 | 0.00000 | Uiso | 1.00 |
| C43 | C | 0.60876 | 0.10875 | 0.60873 | 0.00000 | Uiso | 1.00 |
| C44 | C | 0.64127 | 0.14124 | 0.64124 | 0.00000 | Uiso | 1.00 |
| C45 | C | 0.35874 | 0.14126 | 0.35876 | 0.00000 | Uiso | 1.00 |
| C46 | C | 0.39125 | 0.10875 | 0.39124 | 0.00000 | Uiso | 1.00 |
| C47 | C | 0.35882 | 0.35882 | 0.14138 | 0.00000 | Uiso | 1.00 |
| C48 | C | 0.39128 | 0.39128 | 0.10881 | 0.00000 | Uiso | 1.00 |
| C49 | C | 0.85875 | 0.64126 | 0.35875 | 0.00000 | Uiso | 1.00 |
| C50 | C | 0.89125 | 0.60876 | 0.39125 | 0.00000 | Uiso | 1.00 |
| C51 | C | 0.60875 | 0.60876 | 0.10874 | 0.00000 | Uiso | 1.00 |
| C52 | C | 0.64123 | 0.64125 | 0.14125 | 0.00000 | Uiso | 1.00 |
| C53 | C | 0.89124 | 0.39124 | 0.60874 | 0.00000 | Uiso | 1.00 |
| C54 | C | 0.85874 | 0.35875 | 0.64125 | 0.00000 | Uiso | 1.00 |
| C55 | C | 0.77094 | 0.34807 | 0.72906 | 0.00000 | Uiso | 1.00 |
| C56 | C | 0.72906 | 0.34806 | 0.77094 | 0.00000 | Uiso | 1.00 |
| C57 | C | 0.77094 | 0.27094 | 0.65194 | 0.00000 | Uiso | 1.00 |
| C58 | C | 0.72906 | 0.22906 | 0.65194 | 0.00000 | Uiso | 1.00 |
| C59 | C | 0.65192 | 0.22906 | 0.72906 | 0.00000 | Uiso | 1.00 |
| C60 | C | 0.65192 | 0.27094 | 0.77094 | 0.00000 | Uiso | 1.00 |
| C61 | C | 0.77094 | 0.15194 | 0.77094 | 0.00000 | Uiso | 1.00 |
| C62 | C | 0.72906 | 0.15194 | 0.72907 | 0.00000 | Uiso | 1.00 |

|      |   |         |         |         |         |      |      |
|------|---|---------|---------|---------|---------|------|------|
| C63  | C | 0.72906 | 0.27094 | 0.84806 | 0.00000 | Uiso | 1.00 |
| C64  | C | 0.77094 | 0.22906 | 0.84806 | 0.00000 | Uiso | 1.00 |
| C65  | C | 0.84807 | 0.27094 | 0.72907 | 0.00000 | Uiso | 1.00 |
| C66  | C | 0.84807 | 0.22905 | 0.77095 | 0.00000 | Uiso | 1.00 |
| C67  | C | 0.27094 | 0.84806 | 0.72907 | 0.00000 | Uiso | 1.00 |
| C68  | C | 0.22906 | 0.84807 | 0.77095 | 0.00000 | Uiso | 1.00 |
| C69  | C | 0.22905 | 0.77095 | 0.84807 | 0.00000 | Uiso | 1.00 |
| C70  | C | 0.27094 | 0.72906 | 0.84806 | 0.00000 | Uiso | 1.00 |
| C71  | C | 0.34806 | 0.72906 | 0.77094 | 0.00000 | Uiso | 1.00 |
| C72  | C | 0.34806 | 0.77094 | 0.72906 | 0.00000 | Uiso | 1.00 |
| C73  | C | 0.15193 | 0.77094 | 0.77094 | 0.00000 | Uiso | 1.00 |
| C74  | C | 0.15193 | 0.72906 | 0.72906 | 0.00000 | Uiso | 1.00 |
| C75  | C | 0.27093 | 0.65194 | 0.77094 | 0.00000 | Uiso | 1.00 |
| C76  | C | 0.22905 | 0.65193 | 0.72906 | 0.00000 | Uiso | 1.00 |
| C77  | C | 0.27094 | 0.77094 | 0.65193 | 0.00000 | Uiso | 1.00 |
| C78  | C | 0.22906 | 0.72906 | 0.65193 | 0.00000 | Uiso | 1.00 |
| C79  | C | 0.22908 | 0.34811 | 0.27102 | 0.00000 | Uiso | 1.00 |
| C80  | C | 0.27102 | 0.34816 | 0.22920 | 0.00000 | Uiso | 1.00 |
| C81  | C | 0.34811 | 0.22909 | 0.27102 | 0.00000 | Uiso | 1.00 |
| C82  | C | 0.34815 | 0.27101 | 0.22920 | 0.00000 | Uiso | 1.00 |
| C83  | C | 0.22904 | 0.27092 | 0.34806 | 0.00000 | Uiso | 1.00 |
| C84  | C | 0.27092 | 0.22905 | 0.34806 | 0.00000 | Uiso | 1.00 |
| C85  | C | 0.22911 | 0.22912 | 0.15203 | 0.00000 | Uiso | 1.00 |
| C86  | C | 0.27101 | 0.27102 | 0.15210 | 0.00000 | Uiso | 1.00 |
| C87  | C | 0.22905 | 0.15193 | 0.22906 | 0.00000 | Uiso | 1.00 |
| C88  | C | 0.27094 | 0.15193 | 0.27093 | 0.00000 | Uiso | 1.00 |
| C89  | C | 0.15192 | 0.22905 | 0.22905 | 0.00000 | Uiso | 1.00 |
| C90  | C | 0.15193 | 0.27094 | 0.27092 | 0.00000 | Uiso | 1.00 |
| C91  | C | 0.72905 | 0.65193 | 0.22906 | 0.00000 | Uiso | 1.00 |
| C92  | C | 0.77094 | 0.65194 | 0.27094 | 0.00000 | Uiso | 1.00 |
| C93  | C | 0.77093 | 0.72906 | 0.34806 | 0.00000 | Uiso | 1.00 |
| C94  | C | 0.72905 | 0.77094 | 0.34807 | 0.00000 | Uiso | 1.00 |
| C95  | C | 0.65194 | 0.72906 | 0.22906 | 0.00000 | Uiso | 1.00 |
| C96  | C | 0.65194 | 0.77094 | 0.27093 | 0.00000 | Uiso | 1.00 |
| C97  | C | 0.72906 | 0.72906 | 0.15193 | 0.00000 | Uiso | 1.00 |
| C98  | C | 0.77094 | 0.77094 | 0.15193 | 0.00000 | Uiso | 1.00 |
| C99  | C | 0.84806 | 0.72906 | 0.27093 | 0.00000 | Uiso | 1.00 |
| C100 | C | 0.84807 | 0.77094 | 0.22906 | 0.00000 | Uiso | 1.00 |
| C101 | C | 0.72906 | 0.84807 | 0.27094 | 0.00000 | Uiso | 1.00 |
| C102 | C | 0.77095 | 0.84807 | 0.22906 | 0.00000 | Uiso | 1.00 |
| C103 | C | 0.47906 | 0.52094 | 0.90194 | 0.00000 | Uiso | 1.00 |
| C104 | C | 0.52094 | 0.47906 | 0.90194 | 0.00000 | Uiso | 1.00 |
| C105 | C | 0.90194 | 0.47905 | 0.52093 | 0.00000 | Uiso | 1.00 |
| C106 | C | 0.90194 | 0.52094 | 0.47906 | 0.00000 | Uiso | 1.00 |
| C107 | C | 0.52095 | 0.52094 | 0.09806 | 0.00000 | Uiso | 1.00 |

|      |   |         |         |         |         |      |      |
|------|---|---------|---------|---------|---------|------|------|
| C108 | C | 0.47906 | 0.90193 | 0.52094 | 0.00000 | Uiso | 1.00 |
| C109 | C | 0.52094 | 0.90194 | 0.47907 | 0.00000 | Uiso | 1.00 |
| C110 | C | 0.43118 | 0.43118 | 1.06882 | 0.00000 | Uiso | 1.00 |
| C111 | C | 0.56882 | 0.56882 | 1.06882 | 0.00000 | Uiso | 1.00 |
| C112 | C | 0.93118 | 0.93118 | 1.06882 | 0.00000 | Uiso | 1.00 |
| C113 | C | 0.47907 | 0.47906 | 1.09805 | 0.00000 | Uiso | 1.00 |
| C114 | C | 0.40193 | 0.52093 | 0.97906 | 0.00000 | Uiso | 1.00 |
| C115 | C | 0.40193 | 0.47906 | 1.02094 | 0.00000 | Uiso | 1.00 |
| C116 | C | 0.47905 | 0.59807 | 0.97906 | 0.00000 | Uiso | 1.00 |
| C117 | C | 0.52093 | 0.59807 | 1.02094 | 0.00000 | Uiso | 1.00 |
| C118 | C | 0.59807 | 0.47906 | 0.97906 | 0.00000 | Uiso | 1.00 |
| C119 | C | 0.59807 | 0.52094 | 1.02094 | 0.00000 | Uiso | 1.00 |
| C120 | C | 0.52093 | 0.40194 | 0.97906 | 0.00000 | Uiso | 1.00 |
| C121 | C | 0.47905 | 0.40192 | 1.02095 | 0.00000 | Uiso | 1.00 |
| C122 | C | 0.43118 | 1.06882 | 0.43118 | 0.00000 | Uiso | 1.00 |
| C123 | C | 0.56882 | 1.06882 | 0.56882 | 0.00000 | Uiso | 1.00 |
| C124 | C | 0.93118 | 1.06882 | 0.93118 | 0.00000 | Uiso | 1.00 |
| C125 | C | 0.52094 | 1.09806 | 0.52094 | 0.00000 | Uiso | 1.00 |
| C126 | C | 0.47905 | 1.09807 | 0.47906 | 0.00000 | Uiso | 1.00 |
| C127 | C | 0.47906 | 1.02094 | 0.40194 | 0.00000 | Uiso | 1.00 |
| C128 | C | 0.52094 | 0.97906 | 0.40194 | 0.00000 | Uiso | 1.00 |
| C129 | C | 0.52095 | 1.02094 | 0.59807 | 0.00000 | Uiso | 1.00 |
| C130 | C | 0.47906 | 0.97906 | 0.59806 | 0.00000 | Uiso | 1.00 |
| C131 | C | 0.59806 | 1.02094 | 0.52094 | 0.00000 | Uiso | 1.00 |
| C132 | C | 0.59807 | 0.97906 | 0.47906 | 0.00000 | Uiso | 1.00 |
| C133 | C | 0.40193 | 1.02094 | 0.47906 | 0.00000 | Uiso | 1.00 |
| C134 | C | 0.40194 | 0.97906 | 0.52095 | 0.00000 | Uiso | 1.00 |
| C135 | C | 1.06882 | 0.43118 | 0.43118 | 0.00000 | Uiso | 1.00 |
| C136 | C | 1.06882 | 0.56882 | 0.56882 | 0.00000 | Uiso | 1.00 |
| C137 | C | 1.06882 | 0.93118 | 0.93118 | 0.00000 | Uiso | 1.00 |
| C138 | C | 1.09806 | 0.52094 | 0.52094 | 0.00000 | Uiso | 1.00 |
| C139 | C | 1.09807 | 0.47906 | 0.47906 | 0.00000 | Uiso | 1.00 |
| C140 | C | 1.06882 | 1.06882 | 1.06882 | 0.00000 | Uiso | 1.00 |
| C141 | C | 1.02094 | 0.97906 | 0.90194 | 0.00000 | Uiso | 1.00 |
| C142 | C | 0.97906 | 1.02094 | 0.90193 | 0.00000 | Uiso | 1.00 |
| C143 | C | 1.02093 | 1.09807 | 1.02095 | 0.00000 | Uiso | 1.00 |
| C144 | C | 0.97906 | 1.09807 | 0.97906 | 0.00000 | Uiso | 1.00 |
| C145 | C | 1.02094 | 0.52094 | 0.59807 | 0.00000 | Uiso | 1.00 |
| C146 | C | 0.97906 | 0.47907 | 0.59807 | 0.00000 | Uiso | 1.00 |
| C147 | C | 1.02093 | 0.59806 | 0.52094 | 0.00000 | Uiso | 1.00 |
| C148 | C | 0.97905 | 0.59807 | 0.47906 | 0.00000 | Uiso | 1.00 |
| C149 | C | 1.02094 | 0.40194 | 0.47906 | 0.00000 | Uiso | 1.00 |
| C150 | C | 0.97906 | 0.40193 | 0.52094 | 0.00000 | Uiso | 1.00 |
| C151 | C | 0.97906 | 0.52094 | 0.40193 | 0.00000 | Uiso | 1.00 |
| C152 | C | 1.02095 | 0.47906 | 0.40193 | 0.00000 | Uiso | 1.00 |



|      |   |         |         |         |         |      |      |
|------|---|---------|---------|---------|---------|------|------|
| C153 | C | 1.02094 | 1.02094 | 1.09807 | 0.00000 | Uiso | 1.00 |
| C154 | C | 0.97906 | 0.97906 | 1.09807 | 0.00000 | Uiso | 1.00 |
| C155 | C | 1.02093 | 0.90194 | 0.97906 | 0.00000 | Uiso | 1.00 |
| C156 | C | 0.97906 | 0.90193 | 1.02094 | 0.00000 | Uiso | 1.00 |
| C157 | C | 0.90194 | 1.02094 | 0.97906 | 0.00000 | Uiso | 1.00 |
| C158 | C | 0.90194 | 0.97906 | 1.02094 | 0.00000 | Uiso | 1.00 |
| C159 | C | 1.09806 | 1.02094 | 1.02094 | 0.00000 | Uiso | 1.00 |
| C160 | C | 1.09807 | 0.97906 | 0.97906 | 0.00000 | Uiso | 1.00 |

loop\_

\_geom\_bond\_atom\_site\_label\_1

\_geom\_bond\_atom\_site\_label\_2

\_geom\_bond\_distance

\_geom\_bond\_site\_symmetry\_2

\_ccdc\_geom\_bond\_type

|    |     |       |   |   |
|----|-----|-------|---|---|
| C1 | C89 | 1.622 | . | S |
| C1 | C85 | 1.623 | . | S |
| C1 | C87 | 1.622 | . | S |
| C1 | C40 | 1.520 | . | S |
| C2 | C83 | 1.622 | . | S |
| C2 | C79 | 1.621 | . | S |
| C2 | C90 | 1.622 | . | S |
| C2 | C33 | 1.521 | . | S |
| C3 | C82 | 1.621 | . | S |
| C3 | C80 | 1.621 | . | S |
| C3 | C86 | 1.623 | . | S |
| C3 | C47 | 1.520 | . | S |
| C4 | C81 | 1.621 | . | S |
| C4 | C84 | 1.622 | . | S |
| C4 | C88 | 1.622 | . | S |
| C4 | C45 | 1.521 | . | S |
| C5 | C76 | 1.622 | . | S |
| C5 | C74 | 1.622 | . | S |
| C5 | C78 | 1.622 | . | S |
| C5 | C25 | 1.520 | . | S |
| C6 | C95 | 1.622 | . | S |
| C6 | C97 | 1.622 | . | S |
| C6 | C91 | 1.622 | . | S |
| C6 | C52 | 1.520 | . | S |
| C7 | C58 | 1.622 | . | S |
| C7 | C59 | 1.622 | . | S |
| C7 | C44 | 1.520 | . | S |
| C7 | C62 | 1.622 | . | S |
| C8 | C61 | 1.622 | . | S |
| C8 | C66 | 1.622 | . | S |
| C8 | C64 | 1.622 | . | S |

|     |      |       |   |   |
|-----|------|-------|---|---|
| C8  | C42  | 1.520 | . | S |
| C9  | C69  | 1.622 | . | S |
| C9  | C73  | 1.622 | . | S |
| C9  | C68  | 1.622 | . | S |
| C9  | C27  | 1.520 | . | S |
| C10 | C102 | 1.622 | . | S |
| C10 | C98  | 1.622 | . | S |
| C10 | C100 | 1.622 | . | S |
| C10 | C38  | 1.520 | . | S |
| C11 | C106 | 1.622 | . | S |
| C11 | C148 | 1.622 | . | S |
| C11 | C151 | 1.622 | . | S |
| C11 | C50  | 1.521 | . | S |
| C12 | C99  | 1.622 | . | S |
| C12 | C92  | 1.622 | . | S |
| C12 | C93  | 1.622 | . | S |
| C12 | C49  | 1.521 | . | S |
| C13 | C65  | 1.622 | . | S |
| C13 | C57  | 1.622 | . | S |
| C13 | C55  | 1.622 | . | S |
| C13 | C54  | 1.521 | . | S |
| C14 | C105 | 1.622 | . | S |
| C14 | C146 | 1.622 | . | S |
| C14 | C150 | 1.622 | . | S |
| C14 | C53  | 1.521 | . | S |
| C15 | C70  | 1.622 | . | S |
| C15 | C75  | 1.622 | . | S |
| C15 | C71  | 1.622 | . | S |
| C15 | C29  | 1.521 | . | S |
| C16 | C103 | 1.622 | . | S |
| C16 | C114 | 1.622 | . | S |
| C16 | C116 | 1.622 | . | S |
| C16 | C30  | 1.521 | . | S |
| C17 | C104 | 1.622 | . | S |
| C17 | C118 | 1.622 | . | S |
| C17 | C120 | 1.622 | . | S |
| C17 | C36  | 1.521 | . | S |
| C18 | C63  | 1.622 | . | S |
| C18 | C60  | 1.622 | . | S |
| C18 | C56  | 1.622 | . | S |
| C18 | C35  | 1.521 | . | S |
| C19 | C101 | 1.622 | . | S |
| C19 | C96  | 1.622 | . | S |
| C19 | C94  | 1.622 | . | S |
| C19 | C31  | 1.521 | . | S |

|     |      |       |       |   |
|-----|------|-------|-------|---|
| C20 | C109 | 1.622 | .     | S |
| C20 | C128 | 1.622 | .     | S |
| C20 | C132 | 1.622 | .     | S |
| C20 | C32  | 1.521 | .     | S |
| C21 | C67  | 1.622 | .     | S |
| C21 | C77  | 1.622 | .     | S |
| C21 | C72  | 1.622 | .     | S |
| C21 | C24  | 1.521 | .     | S |
| C22 | C108 | 1.622 | .     | S |
| C22 | C130 | 1.622 | .     | S |
| C22 | C134 | 1.622 | .     | S |
| C22 | C23  | 1.521 | .     | S |
| C23 | C24  | 1.238 | .     | T |
| C25 | C26  | 1.238 | .     | T |
| C26 | C136 | 1.521 | 1_455 | S |
| C27 | C28  | 1.238 | .     | T |
| C28 | C137 | 1.520 | 1_455 | S |
| C29 | C30  | 1.238 | .     | T |
| C31 | C32  | 1.238 | .     | T |
| C33 | C34  | 1.238 | .     | T |
| C34 | C135 | 1.521 | 1_455 | S |
| C35 | C36  | 1.238 | .     | T |
| C37 | C38  | 1.238 | .     | T |
| C37 | C112 | 1.520 | 1_554 | S |
| C39 | C40  | 1.238 | .     | T |
| C39 | C140 | 1.520 | 1_444 | S |
| C41 | C42  | 1.238 | .     | T |
| C41 | C124 | 1.520 | 1_545 | S |
| C43 | C44  | 1.238 | .     | T |
| C43 | C123 | 1.520 | 1_545 | S |
| C45 | C46  | 1.238 | .     | T |
| C46 | C122 | 1.521 | 1_545 | S |
| C47 | C48  | 1.238 | .     | T |
| C48 | C110 | 1.520 | 1_554 | S |
| C49 | C50  | 1.238 | .     | T |
| C51 | C52  | 1.238 | .     | T |
| C51 | C111 | 1.520 | 1_554 | S |
| C53 | C54  | 1.238 | .     | T |
| C55 | C56  | 1.302 | .     | T |
| C57 | C58  | 1.302 | .     | T |
| C59 | C60  | 1.302 | .     | T |
| C61 | C62  | 1.302 | .     | T |
| C63 | C64  | 1.302 | .     | T |
| C65 | C66  | 1.302 | .     | T |
| C67 | C68  | 1.302 | .     | T |

|      |      |       |       |   |
|------|------|-------|-------|---|
| C69  | C70  | 1.302 | .     | T |
| C71  | C72  | 1.302 | .     | T |
| C73  | C74  | 1.302 | .     | T |
| C75  | C76  | 1.302 | .     | T |
| C77  | C78  | 1.302 | .     | T |
| C79  | C80  | 1.302 | .     | T |
| C81  | C82  | 1.302 | .     | T |
| C83  | C84  | 1.302 | .     | T |
| C85  | C86  | 1.303 | .     | T |
| C87  | C88  | 1.302 | .     | T |
| C89  | C90  | 1.302 | .     | T |
| C91  | C92  | 1.302 | .     | T |
| C93  | C94  | 1.302 | .     | T |
| C95  | C96  | 1.302 | .     | T |
| C97  | C98  | 1.302 | .     | T |
| C99  | C100 | 1.302 | .     | T |
| C101 | C102 | 1.302 | .     | T |
| C103 | C104 | 1.302 | .     | T |
| C105 | C106 | 1.302 | .     | T |
| C107 | C113 | 1.302 | 1_554 | T |
| C107 | C111 | 1.622 | 1_554 | S |
| C108 | C109 | 1.302 | .     | T |
| C110 | C113 | 1.622 | .     | S |
| C110 | C115 | 1.622 | .     | S |
| C110 | C121 | 1.622 | .     | S |
| C110 | C48  | 1.520 | 1_556 | S |
| C111 | C117 | 1.622 | .     | S |
| C111 | C119 | 1.622 | .     | S |
| C111 | C51  | 1.520 | 1_556 | S |
| C111 | C107 | 1.622 | 1_556 | S |
| C112 | C154 | 1.622 | .     | S |
| C112 | C156 | 1.622 | .     | S |
| C112 | C158 | 1.622 | .     | S |
| C112 | C37  | 1.520 | 1_556 | S |
| C113 | C107 | 1.302 | 1_556 | T |
| C114 | C115 | 1.302 | .     | T |
| C116 | C117 | 1.302 | .     | T |
| C118 | C119 | 1.302 | .     | T |
| C120 | C121 | 1.302 | .     | T |
| C122 | C126 | 1.622 | .     | S |
| C122 | C127 | 1.622 | .     | S |
| C122 | C133 | 1.622 | .     | S |
| C122 | C46  | 1.521 | 1_565 | S |
| C123 | C125 | 1.622 | .     | S |
| C123 | C129 | 1.622 | .     | S |

|      |      |       |       |   |
|------|------|-------|-------|---|
| C123 | C131 | 1.622 | .     | S |
| C123 | C43  | 1.520 | 1_565 | S |
| C124 | C144 | 1.622 | .     | S |
| C124 | C142 | 1.622 | .     | S |
| C124 | C157 | 1.622 | .     | S |
| C124 | C41  | 1.520 | 1_565 | S |
| C125 | C126 | 1.302 | .     | T |
| C127 | C128 | 1.302 | .     | T |
| C129 | C130 | 1.302 | .     | T |
| C131 | C132 | 1.302 | .     | T |
| C133 | C134 | 1.302 | .     | T |
| C135 | C139 | 1.622 | .     | S |
| C135 | C152 | 1.622 | .     | S |
| C135 | C34  | 1.521 | 1_655 | S |
| C135 | C149 | 1.622 | .     | S |
| C136 | C138 | 1.622 | .     | S |
| C136 | C145 | 1.622 | .     | S |
| C136 | C147 | 1.622 | .     | S |
| C136 | C26  | 1.521 | 1_655 | S |
| C137 | C141 | 1.622 | .     | S |
| C137 | C155 | 1.622 | .     | S |
| C137 | C160 | 1.622 | .     | S |
| C137 | C28  | 1.520 | 1_655 | S |
| C138 | C139 | 1.302 | .     | T |
| C140 | C143 | 1.622 | .     | S |
| C140 | C159 | 1.622 | .     | S |
| C140 | C39  | 1.520 | 1_666 | S |
| C140 | C153 | 1.622 | .     | S |
| C141 | C142 | 1.302 | .     | T |
| C143 | C144 | 1.302 | .     | T |
| C145 | C146 | 1.302 | .     | T |
| C147 | C148 | 1.302 | .     | T |
| C149 | C150 | 1.302 | .     | T |
| C151 | C152 | 1.302 | .     | T |
| C153 | C154 | 1.302 | .     | T |
| C155 | C156 | 1.302 | .     | T |
| C157 | C158 | 1.302 | .     | T |
| C159 | C160 | 1.302 | .     | T |
